# Supplementary material for: Efficient phosphate removal utilizing N, Zn-doped carbon dots as an innovative nanoadsorbent
Source: Royal Society of Chemistry journal article supplement (doi:10.1039/d4ra02428a), 2024-01-01
Supplement: d4ra02428a1.pdf [file d4ra02428a1.pdf]

## Electronic Supporting Material

### Efficient phosphate removal utilizing N, Zn-doped carbon dots as an innovative nanoadsorbent

Mina Alikhani <sup>a</sup>, Ehsan Khoshkalam <sup>b,\*</sup>, Jalal Sadeghi <sup>b</sup>, Laura Bulgariu <sup>c</sup>, Hossein Eshghi <sup>d</sup>

<sup>a</sup> Department of Chemistry, Payame Noor University, Tehran, Iran

<sup>b</sup> Department of Soil Science, Faculty of Agriculture, Ferdowsi University of Mashhad (FUM), Mashhad, Iran

<sup>c</sup> Department of Environmental Engineering and Management, Cristofor Simionescu Faculty of Chemical Engineering and Environmental Protection, Gheorghe Asachi Technical University of Iasi, 700050 Iasi, Romania

<sup>d</sup> Department of Chemistry, Faculty of Science, Ferdowsi University of Mashhad (FUM), Mashhad, Iran

\* Corresponding author: Ehsan Khoshkalam, Department of Soil Science, Faculty of Agriculture, Ferdowsi University of Mashhad (FUM), Mashhad, Iran  
Tel: +989104050217  
Fax: +985138807147  
E-mail: [e.khoshkalam@alumni.um.ac.ir](mailto:e.khoshkalam@alumni.um.ac.ir) (E. Khoshkalam)

## **Table of contents**

Table. S1. QY of Zn-NCDs according to quinine sulfate

Figure S1. Schematic of Zn-N-CDs synthesis

Figure S2. TEM image of Zn-N-CDs whereas inset shows the particle size distribution histogram

Figure S3. The mean particle size by dynamic light scattering (DLS) of Zn-N-CDs

## 1. Characterization

### 1.1. Quantum yield measurement

The quantum yield (QY) is calculated using a quinine sulfate standard with a QY of 0.54 in 0.1 M H<sub>2</sub>SO<sub>4</sub>.

$$QY_x = QY_s \cdot \frac{I_x}{I_s} \cdot \frac{A_s}{A_x} \cdot \frac{\eta_x^2}{\eta_s^2} \quad (1)$$

Where 'QY' is the fluorescent quantum yield, 'I' is the integrated fluorescent emission intensity at excitation of 360 nm, 'A' is the optical density, 'η' is the refraction coefficient of a specific solvent (for the distilled water η<sub>x</sub>/η<sub>s</sub> = 1), 'x' is for the synthesized Zn-N-CDs, and 's' is for the standard.

**Table. S1** QY of Zn-N-CDs according to quinine sulfate

| Sample          | integrated emission intensity<br>at λ <sub>ex</sub> = 360 nm | Absorption at 360 nm | QY (%) |
|-----------------|--------------------------------------------------------------|----------------------|--------|
| Quinine sulfate | 24297.51                                                     | 0.052                | 54     |
| Zn-N-CDs        | 17357.66                                                     | 0.042                | 47.54  |

## 2. Figures

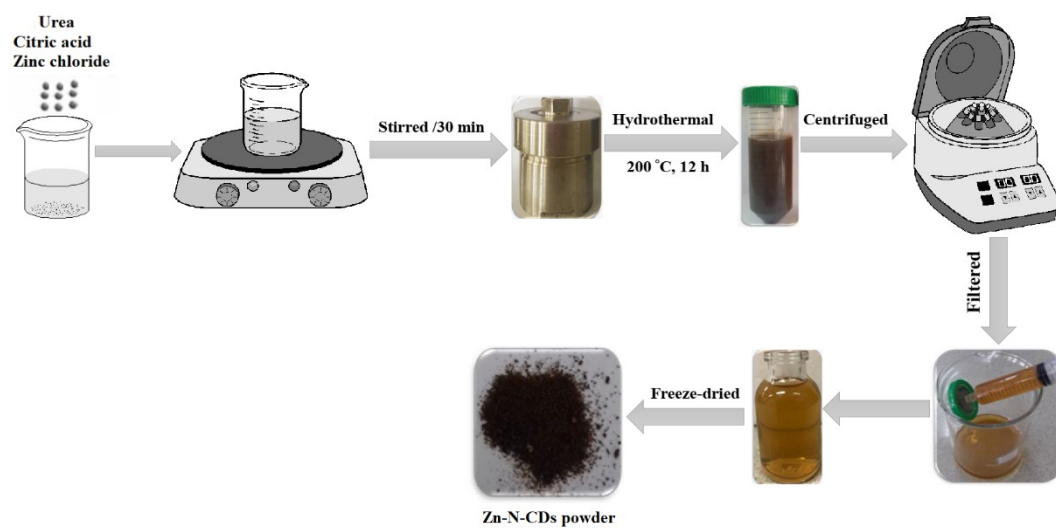

Fig. S1. Schematic of Zn-N-CDs synthesis

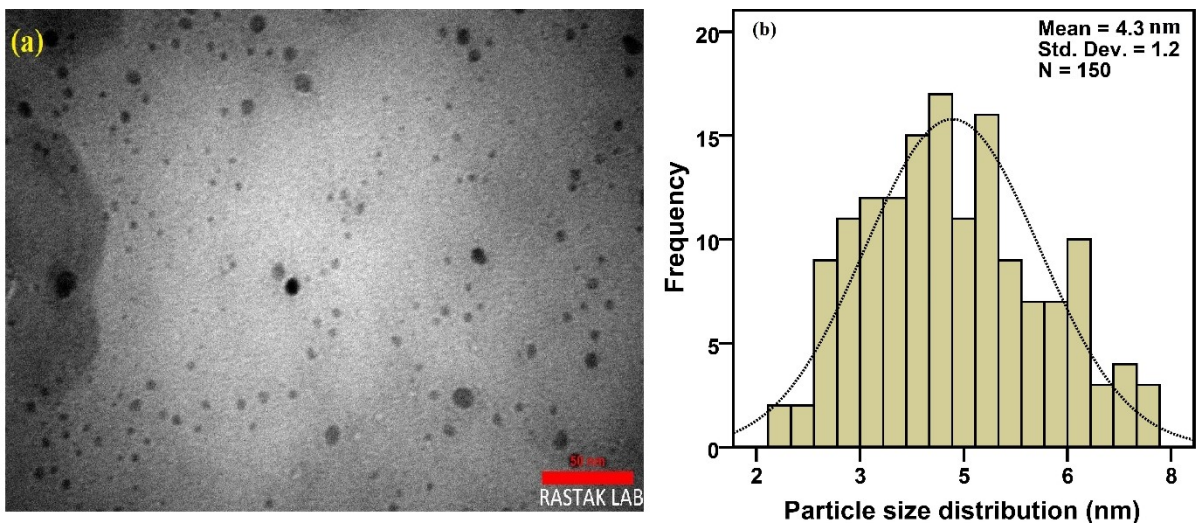

Fig. S2. TEM image of Zn-N-CDs whereas inset shows the particle size distribution histogram

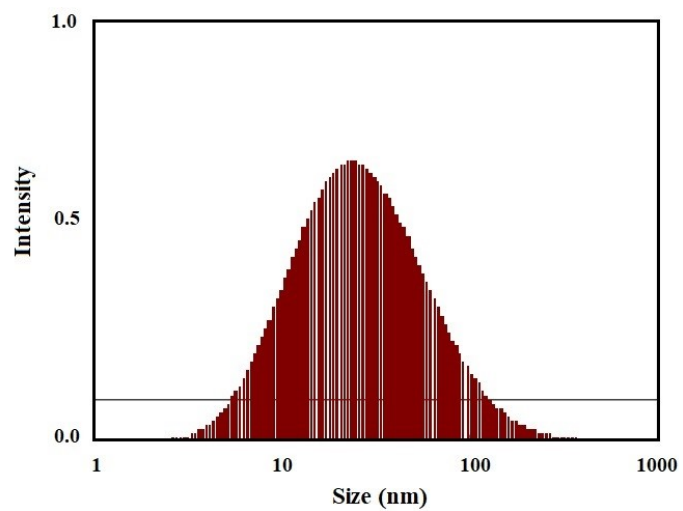

Fig. S3. The mean particle size by dynamic light scattering (DLS) of Zn-N-CDs
